# Supplementary material
Source: MDPI journal article supplement (https://www.mdpi.com/2073-4395/5/1/55)
Supplement: s2 [file s2]

Supplementary Materials

**Table S1.** Entry list showing pedigree, translocation experimental group (T4 or TC14), translocation status and inclusion into yield trials.

| **Entry** | **Pedigree** | **Trans. Group** | **Translocation** | **GES  2000** | **Gundi  2000** | **Moom  2000** | **Condo  2001** | **GES  2001** | **Gundi  2001** | **Moom  2001** | **Grif  2006** | **Gun  2006** | **Gun  2007** | **Yanco  2007** | **Tem 2008** | **Yanco  Dry 2008** | **Yanco irr 2008** |
| --- | --- | --- | --- | --- | --- | --- | --- | --- | --- | --- | --- | --- | --- | --- | --- | --- | --- |
| Apollo | A2806/R5084 | T4 | Null |  | y | y | y | y | y | y |  |  |  |  |  |  |  |
| B1814K01 | B1814K01 | T4 | Null | y | y | y |  |  |  |  |  |  |  |  |  |  |  |
| B2806.19.1-1 | B2806*3/C80.1 | T4 | T4m1 |  |  | y |  |  |  |  |  |  |  |  |  |  |  |
| B2806.19.1-2 | B2806*3/C80.1 | T4 | T4m1 |  |  | y |  |  |  |  |  |  |  |  |  |  |  |
| B2806C | B2806C | T4 | Null |  | y | y |  |  |  |  |  |  |  |  |  |  |  |
| B403C | C80.1/3*H45 | T4 | T4m1 | y | y | y | y | y | y | y |  |  |  |  |  |  |  |
| B403D | C80.1/3*H45 | T4 | T4m1 | y | y | y | y | y | y | y |  |  |  |  |  |  |  |
| Banks | Banks | T4 | Null | y |  |  | y | y | y | y |  |  |  |  |  |  |  |
| BANKS.19.1-1 | C80.1/4*BANKS | T4 | T4m1 |  |  |  | y | y | y | y |  |  |  |  |  |  |  |
| BANKS.19.1-2 | C80.1/4*BANKS | T4 | T4m1 |  |  |  | y | y | y | y |  |  |  |  |  |  |  |
| BANKS.19.1-3 | C80.1/4*BANKS | T4 | T4m1 |  |  |  | y | y | y | y |  |  |  |  |  |  |  |
| BANKS.19.2-1 | C80.2/4*BANKS | T4 | T4m2 | y |  |  | y | y | y | y |  |  |  |  |  |  |  |
| BATAVIA | BATAVIA | T4 | Null | y | y | y | y | y | y | y |  |  |  |  |  |  |  |
| BATAVIA.19.1-1 | C80.1/3*BATAVIA | T4 | T4m1 | y | y | y | y | y | y | y |  |  |  |  |  |  |  |
| BATAVIA.19.1-2 | C80.1/ 3*BATAVIA | T4 | T4m1 | y |  | y | y | y | y | y |  |  |  |  |  |  |  |
| BAYONET | BAYONET | T4 | Null |  |  |  |  |  | y |  |  |  |  |  |  |  |  |
| BAYONET.19.1-1 | C80.1/ 3* BAYONET | T4 | T4m1 |  |  |  |  |  | y |  |  |  |  |  |  |  |  |
| BAYONET.19.1-3 | C80.1/ 3* BAYONET | T4 | T4m1 |  |  |  |  |  | y | y |  |  |  |  |  |  |  |
| CONDOR | CONDOR | T4 | Null | y | y | y | y | y | y | y |  |  | y |  | y | y | y |
| CONDOR.19.1-1 | C80.1/6*CONDOR | T4 | T4m1 | y | y | y | y | y | y | y |  |  | y |  | y | y | y |
| CONDOR.19.2-1 | C80.2/6*CONDOR | T4 | T4m2 | y |  |  | y | y | y | y |  |  |  |  |  |  |  |

**Table S1.** *Cont.*

| **Entry** | **Pedigree** | **Trans. Group** | **Translocation** | **GES  2000** | **Gundi  2000** | **Moom  2000** | **Condo  2001** | **GES  2001** | **Gundi  2001** | **Moom  2001** | **Grif  2006** | **Gun  2006** | **Gun  2007** | **Yanco  2007** | **Tem 2008** | **Yanco  Dry 2008** | **Yanco irr 2008** |
| --- | --- | --- | --- | --- | --- | --- | --- | --- | --- | --- | --- | --- | --- | --- | --- | --- | --- |
| COOK | COOK | T4 | Null | y | y | y | y | y | y | y |  |  |  |  |  |  |  |
| COOK.19.1-1 | C80.1/4*COOK | T4 | T4m1 | y | y | y | y | y | y | y |  |  |  |  |  |  |  |
| COOK.19.1-2 | C80.1/4*COOK | T4 | T4m1 | y | y | y | y | y | y | y |  |  |  |  |  |  |  |
| COOK.19.1-3 | C80.1/4*COOK | T4 | T4m1 | y |  | y | y | y | y | y |  |  |  |  |  |  |  |
| COOK.19.2-1 | C80.2/4*COOK | T4 | T4m2 | y |  | y | y | y | y | y |  |  |  |  |  |  |  |
| COOK.19.2-2 | C80.2/4*COOK | T4 | T4m2 | y | y | y | y | y | y | y |  |  |  |  |  |  |  |
| CUNNINGHAM | CUNNINGHAM | T4 | Null |  |  | y |  |  |  |  |  |  |  |  |  |  |  |
| H45 | H45 | T4 | Null | y | y | y | y | y | y | y |  |  |  |  |  |  |  |
| HARTOG | HARTOG | T4 | Null | y |  |  |  |  |  |  |  |  |  |  |  |  |  |
| JANZ | JANZ | T4 | Null | y | y | y | y | y | y | y |  |  |  |  |  |  |  |
| KIATA | KIATA | T4 | Null | y | y | y |  |  |  |  |  |  |  |  |  |  |  |
| KIATA.19.1-1 | C80.1/4*KIATA | T4 | T4m1 | y | y | y |  |  |  |  |  |  |  |  |  |  |  |
| KIATA.19.2-1 | C80.2/4*KIATA | T4 | T4m2 | y | y | y |  |  |  |  |  |  |  |  |  |  |  |
| LARK | LARK | T4 | Null | y | y | y | y | y | y | y |  |  |  |  |  |  |  |
| LARK.19.1-1 | C80.1/4*LARK | T4 | T4m1 | y | y | y | y | y | y | y |  |  |  |  |  |  |  |
| LOWAN | LOWAN | T4 | Null | y |  | y |  |  |  |  |  |  |  |  |  |  |  |
| LOWAN.19.1-1 | C80.1/4*LOWAN | T4 | T4m1 |  |  | y |  |  |  |  |  |  |  |  |  |  |  |
| MATONG | MATONG | T4 | Null | y | y |  | y | y | y | y |  |  |  |  |  |  |  |
| MATONG.19.2-1 | C80.2/ 6*MATONG | T4 | T4m2 | y |  |  | y | y | y | y |  |  |  |  |  |  |  |
| MATONG.19.2-2 | C80.2/ 6*MATONG | T4 | T4m2 | y |  |  | y | y | y | y |  |  |  |  |  |  |  |
| MATONG.19.2-3 | C80.2/ 6*MATONG | T4 | T4m2 |  |  |  | y | y | y | y |  |  |  |  |  |  |  |
| MERCURY | MERCURY | T4 | Null | y | y | y | y | y | y | y |  |  |  |  |  |  |  |

**Table S1.** *Cont.*

| **Entry** | **Pedigree** | **Trans. Group** | **Translocation** | **GES  2000** | **Gundi  2000** | **Moom  2000** | **Condo  2001** | **GES  2001** | **Gundi  2001** | **Moom  2001** | **Grif  2006** | **Gun  2006** | **Gun  2007** | **Yanco  2007** | **Tem 2008** | **Yanco  Dry 2008** | **Yanco irr 2008** |
| --- | --- | --- | --- | --- | --- | --- | --- | --- | --- | --- | --- | --- | --- | --- | --- | --- | --- |
| OXLEY | OXLEY | T4 | Null | y | y | y | y | y | y | y |  |  |  |  |  |  |  |
| OXLEY.19.2-1 | C80.2/6*OXLEY | T4 | T4m2 | y |  |  | y | y | y | y |  |  |  |  |  |  |  |
| OXLEY.19.2-2 | C80.2/6*OXLEY | T4 | T4m2 |  |  |  | y | y | y | y |  |  |  |  |  |  |  |
| OXLEY.19.2-3 | C80.2/6*OXLEY | T4 | T4m2 | y |  |  | y | y | y | y |  |  |  |  |  |  |  |
| OXLEY.19.2-4 | C80.2/6*OXLEY | T4 | T4m2 | y |  |  | y | y | y | y |  |  |  |  |  |  |  |
| QH71-2 | QH71-2 | T4 | Null | y |  |  |  |  |  |  |  |  |  |  |  |  |  |
| R38549H | R38549H | T4 | Null | y | y | y |  |  |  |  |  |  |  |  |  |  |  |
| R38549H.19.2-1 | C80.2/2*R38549H | T4 | T4m2 | y | y | y |  |  |  |  |  |  |  |  |  |  |  |
| R38568C | R38568C | T4 | Null |  |  |  | y | y | y | y |  |  |  |  |  |  |  |
| R38568C.19.2-1 | C80.2/3*R38568C | T4 | T4m2 | y | y | y | y | y | y | y |  |  |  |  |  |  |  |
| R38568C.19.2-2 | C80.2/3*R38568C | T4 | T4m2 | y |  | y | y | y | y | y |  |  |  |  |  |  |  |
| R38568C.19.2-3 | C80.2/3*R38568C | T4 | T4m2 |  |  |  |  | y | y | y |  |  |  |  |  |  |  |
| SUNVALE | SUNVALE | T4 | Null |  | y | y |  |  |  |  |  |  |  |  |  |  |  |
| VULCAN | VULCAN | T4 | Null | y | y | y | y | y | y | y |  |  |  |  |  |  |  |
| VULCAN.19.2-1 | C80.2/4*VULCAN | T4 | T4m2 | y | y | y | y | y | y | y |  |  |  |  |  |  |  |
| KAMBARA1 | KAMBARA1 | T4 | Null |  |  |  |  |  |  |  | y | y | y | y | y | y | y |
| WHEATEAR | WHEATEAR | T4 | T4 |  |  |  |  |  |  |  | y | y | y | y | y | y | y |
| WEEBILL1 | WEEBILL1 | T4 | Null |  |  |  |  |  |  |  | y | y | y | y | y | y | y |
| 144380 | C80.1/3*BATAVIA//2*WEEBLL1 | T4 | T4m1 |  |  |  |  |  |  |  | y | y | y | y | y | y | y |
| 144381 | C80.1/3*BATAVIA//2*WEEBLL1 | T4 | T4m1 |  |  |  |  |  |  |  | y |  | y | y | y | y | y |
| SERI82/RAYON | SERI82/RAYON | T4 | Null |  |  |  |  |  |  |  | y |  | y | y | y | y | y |

**Table S1.** *Cont.*

| **Entry** | **Pedigree** | **Trans. Group** | **Translocation** | **GES  2000** | **Gundi  2000** | **Moom  2000** | **Condo  2001** | **GES  2001** | **Gundi  2001** | **Moom  2001** | **Grif  2006** | **Gun  2006** | **Gun  2007** | **Yanco  2007** | **Tem 2008** | **Yanco  Dry 2008** | **Yanco irr 2008** |
| --- | --- | --- | --- | --- | --- | --- | --- | --- | --- | --- | --- | --- | --- | --- | --- | --- | --- |
| C80.1/3*QT4118// KAUZ/RAYON/3/ 2*SERI82/RAYON | C80.1/3*QT4118//KAUZ/RAYON/3/2*SERI82/RAYON | T4 | T4m1 |  |  |  |  |  |  |  | y |  | y | y | y | y | y |
| SUPERSERI/KAMBARA1//KAMBARA1 | SUPERSERI/KAMBARA1// KAMBARA1 | T4 | T4 |  |  |  |  |  |  |  | y |  | y | y | y | y | y |
| Gx02.173-DH-01 | Seri82/Superseri | T4 | T4 |  |  |  |  |  |  |  |  |  | y |  | y | y | y |
| Gx02.173-DH-02 | Seri82/Superseri | T4 | Null |  |  |  |  |  |  |  | y |  | y | y | y | y | y |
| Gx02.173-DH-04 | Seri82/Superseri | T4 | Null |  |  |  |  |  |  |  |  |  | y |  | y | y | y |
| Gx02.173-DH-05 | Seri82/Superseri | T4 | Null |  |  |  |  |  |  |  | y |  | y | y | y | y | y |
| Gx02.173-DH-06 | Seri82/Superseri | T4 | Null |  |  |  |  |  |  |  | y |  | y | y | y | y | y |
| Gx02.173-DH-07 | Seri82/Superseri | T4 | Null |  |  |  |  |  |  |  | y |  | y | y | y | y | y |
| Gx02.173-DH-08 | Seri82/Superseri | T4 | Null |  |  |  |  |  |  |  |  |  | y |  | y | y | y |
| Gx02.173-DH-09 | Seri82/Superseri | T4 | Null |  |  |  |  |  |  |  | y |  | y | y | y | y | y |
| Gx02.173-DH-10 | Seri82/Superseri | T4 | Null |  |  |  |  |  |  |  |  |  | y |  | y |  | y |
| Gx02.173-DH-11 | Seri82/Superseri | T4 | T4 |  |  |  |  |  |  |  |  |  | y |  | y | y | y |
| Gx02.173-DH-12 | Seri82/Superseri | T4 | Null |  |  |  |  |  |  |  | y |  | y | y | y | y | y |
| Gx02.173-DH-14 | Seri82/Superseri | T4 | Null |  |  |  |  |  |  |  |  |  | y |  | y |  | y |
| Gx02.173-DH-15 | Seri82/Superseri | T4 | Null |  |  |  |  |  |  |  | y |  | y | y | y | y | y |
| Gx02.173-DH-16 | Seri82/Superseri | T4 | Null |  |  |  |  |  |  |  |  |  | y |  | y | y | Y |
| Gx02.173-DH-17 | Seri82/Superseri | T4 | T4 |  |  |  |  |  |  |  |  |  | y |  | y | y | Y |
| Gx02.173-DH-19 | Seri82/Superseri | T4 | Null |  |  |  |  |  |  |  |  |  | y |  | y | y | Y |
| Gx02.173-DH-21 | Seri82/Superseri | T4 | Lr19 |  |  |  |  |  |  |  | y |  | y | y | y | y | y |
| Gx02.173-DH-22 | Seri82/Superseri | T4 | Null |  |  |  |  |  |  |  |  |  | y |  | y | y | Y |
| Gx02.173-DH-23 | Seri82/Superseri | T4 | T4 |  |  |  |  |  |  |  | y |  | y | y | y | y | y |

**Table S1.** *Cont.*

| **Entry** | **Pedigree** | **Trans. Group** | **Translocation** | **GES  2000** | **Gundi  2000** | **Moom  2000** | **Condo  2001** | **GES  2001** | **Gundi  2001** | **Moom  2001** | **Grif  2006** | **Gun  2006** | **Gun  2007** | **Yanco  2007** | **Tem 2008** | **Yanco  Dry 2008** | **Yanco irr 2008** |
| --- | --- | --- | --- | --- | --- | --- | --- | --- | --- | --- | --- | --- | --- | --- | --- | --- | --- |
| Gx02-013-A-DH-01 | Condor.19.1-1/CONDOR | T4 | T4m1 |  |  |  |  |  |  |  |  |  | y |  | y | y | y |
| Gx02-013-A-DH-02 | Condor.19.1-1/CONDOR | T4 | Null |  |  |  |  |  |  |  |  |  | y |  | y | y | y |
| Gx02-013-A-DH-04 | Condor.19.1-1/CONDOR | T4 | T4m1 |  |  |  |  |  |  |  |  |  | y |  | y | y | y |
| Gx02-013-A-DH-06 | Condor.19.1-1/CONDOR | T4 | Null |  |  |  |  |  |  |  |  |  | y |  | y | y | y |
| Gx02-013-A-DH-07 | Condor.19.1-1/CONDOR | T4 | Null |  |  |  |  |  |  |  |  |  | y |  | y | y | y |
| Gx02-013-B-DH-09 | Condor.19.1-1/CONDOR | T4 | Null |  |  |  |  |  |  |  |  |  | y |  | y | y | y |
| Gx02-013-B-DH-10 | Condor.19.1-1/CONDOR | T4 | Null |  |  |  |  |  |  |  |  |  | y |  | y | y | y |
| Gx02-013-B-DH-11 | Condor.19.1-1/CONDOR | T4 | Null |  |  |  |  |  |  |  |  |  | y |  | y | y | y |
| Gx02-013-B-DH-12 | Condor.19.1-1/CONDOR | T4 | Null |  |  |  |  |  |  |  |  |  | y |  | y | y | y |
| Gx02-013-C-DH-13 | Condor.19.1-1/CONDOR | T4 | T4m1 |  |  |  |  |  |  |  |  |  | y |  | y | y | y |
| Gx02-013-C-DH-14 | Condor.19.1-1/CONDOR | T4 | Null |  |  |  |  |  |  |  |  |  | y |  | y | y | y |
| Gx02-013-C-DH-15 | Condor.19.1-1/CONDOR | T4 | Null |  |  |  |  |  |  |  |  |  | y |  | y | y | y |
| Gx02-013-C-DH-16 | Condor.19.1-1/CONDOR | T4 | T4m1 |  |  |  |  |  |  |  |  |  | y |  | y | y | y |

**Table S1.** *Cont.*

| **Entry** | **Pedigree** | **Trans. Group** | **Translocation** | **GES  2000** | **Gundi  2000** | **Moom  2000** | **Condo  2001** | **GES  2001** | **Gundi  2001** | **Moom  2001** | **Grif  2006** | **Gun  2006** | **Gun  2007** | **Yanco  2007** | **Tem 2008** | **Yanco  Dry 2008** | **Yanco irr 2008** |
| --- | --- | --- | --- | --- | --- | --- | --- | --- | --- | --- | --- | --- | --- | --- | --- | --- | --- |
| Gx02-013-C-DH-18 | Condor.19.1-1/CONDOR | T4 | Null |  |  |  |  |  |  |  |  |  | y |  | y |  |  |
| Gx02-013-C-DH-19 | Condor.19.1-1/CONDOR | T4 | Null |  |  |  |  |  |  |  |  |  | y |  | y |  |  |
| Gx02-013-C-DH-21 | Condor.19.1-1/CONDOR | T4 | T4m1 |  |  |  |  |  |  |  |  |  | y |  | y | y | y |
| Gx02-013-D-DH-22 | Condor.19.1-1/CONDOR | T4 | T4m1 |  |  |  |  |  |  |  |  |  | y |  | y | y | y |
| Gx02-013-D-DH-25 | Condor.19.1-1/CONDOR | T4 | Null |  |  |  |  |  |  |  |  |  | y |  | y | y | y |
| Gx02-013-D-DH-26 | Condor.19.1-1/CONDOR | T4 | T4m1 |  |  |  |  |  |  |  |  |  | y |  | y | y | y |
| Gx02-013-E-DH-27 | Condor.19.1-1/CONDOR | T4 | T4m1 |  |  |  |  |  |  |  |  |  | y |  | y | y | y |
| Gx02-013-E-DH-29 | Condor.19.1-1/CONDOR | T4 | T4m1 |  |  |  |  |  |  |  |  |  | y |  | y | y | y |
| Gx02-013-E-DH-30 | Condor.19.1-1/CONDOR | T4 | Null |  |  |  |  |  |  |  |  |  | y |  | y |  |  |
| Gx02-013-E-DH-31 | Condor.19.1-1/CONDOR | T4 | T4m1 |  |  |  |  |  |  |  |  |  | y |  | y | y | y |
| Seri82 | Seri82 | T4 | Null |  |  |  |  |  |  |  | y |  |  | y |  | y | y |
| Superseri | Superseri | T4 | T4 |  |  |  |  |  |  |  | y |  | y | y | y | y | y |
| Camm | Camm | TC14 | Null |  |  |  |  |  |  |  | y | y | y | y | y | y | y |
| BOW.8*1 | Brookton/Ohm//Westonia | TC14 | Null |  |  |  |  |  |  |  | y |  |  |  |  |  |  |
| Chara | Chara | TC14 | Null |  |  |  |  |  |  |  |  |  | y | y | y | y | y |

**Table S1.** *Cont.*

| **Entry** | **Pedigree** | **Trans. Group** | **Translocation** | **GES  2000** | **Gundi  2000** | **Moom  2000** | **Condo  2001** | **GES  2001** | **Gundi  2001** | **Moom  2001** | **Grif  2006** | **Gun  2006** | **Gun  2007** | **Yanco  2007** | **Tem 2008** | **Yanco  Dry 2008** | **Yanco irr 2008** |
| --- | --- | --- | --- | --- | --- | --- | --- | --- | --- | --- | --- | --- | --- | --- | --- | --- | --- |
| CHOS.12*4 | Chara/Ohm/ Sunbrook | TC14 | Null |  |  |  |  |  |  |  | Y |  |  |  |  |  |  |
| CHOS.12*9 | Chara/Ohm/ Sunbrook | TC14 | Null |  |  |  |  |  |  |  | Y |  |  |  |  |  |  |
| CHOS.9*2 | Chara/Ohm/ Sunbrook | TC14 | TC14 |  |  |  |  |  |  |  | Y |  |  |  |  |  |  |
| CHOS.9*3 | Chara/Ohm/ Sunbrook | TC14 | TC14 |  |  |  |  |  |  |  | Y |  |  |  |  |  |  |
| Drysdale | Drysdale | TC14 | Null |  |  |  |  |  |  |  | y | y | y | y | y | y | y |
| H45 | H45 | TC14 | Null |  |  |  |  |  |  |  |  |  | y | y | y | y | y |
| Janz | Janz | TC14 | Null |  |  |  |  |  |  |  |  |  | y | y | y | y | y |
| Sunbrook | Sunbrook | TC14 | Null |  |  |  |  |  |  |  | y | y | y | y | y | y | y |
| T4*B.2*006 | Thelin/ 4*Brookton | TC14 | TC14 |  |  |  |  |  |  |  | Y |  |  |  |  |  |  |
| T4*B.2*008 | Thelin/ 4*Brookton | TC14 | TC14 |  |  |  |  |  |  |  | Y |  |  |  |  |  |  |
| T4*Ca.1*005 | Thelin/4*Camm | TC14 | Null |  |  |  |  |  |  |  | y | y |  |  |  |  |  |
| T4*Ca.11*001 | Thelin/4*Camm | TC14 | Null |  |  |  |  |  |  |  |  |  | y | y | y | y | y |
| T4*Ca.11*002 | Thelin/4*Camm | TC14 | TC14 |  |  |  |  |  |  |  |  |  | y | y | y | y | y |
| T4*Ca.11*003 | Thelin/4*Camm | TC14 | TC14 |  |  |  |  |  |  |  | y |  | y | y | y | y | y |
| T4*Ca.11*006 | Thelin/4*Camm | TC14 | Null |  |  |  |  |  |  |  | y | y | y | y | y | y | y |
| T4*Ca.11*009 | Thelin/4*Camm | TC14 | Null |  |  |  |  |  |  |  |  |  | y | y | y | y | y |
| T4*Ca.11*010 | Thelin/4*Camm | TC14 | TC14 |  |  |  |  |  |  |  |  |  | y | y | y | y | y |
| T4*Ca.11*013 | Thelin/4*Camm | TC14 | Null |  |  |  |  |  |  |  |  |  | y | y | y | y | y |
| T4*Ca.11*014 | Thelin/4*Camm | TC14 | Null |  |  |  |  |  |  |  | y |  |  |  |  |  |  |
| T4*Ca.5*001 | Thelin/4*Camm | TC14 | TC14 |  |  |  |  |  |  |  |  |  | y | y | y | y | y |
| T4*Ca.5*002 | Thelin/4*Camm | TC14 | TC14 |  |  |  |  |  |  |  |  |  | y | y | y | y | y |

**Table S1.** *Cont.*

| **Entry** | **Pedigree** | **Trans. Group** | **Translocation** | **GES  2000** | **Gundi  2000** | **Moom  2000** | **Condo  2001** | **GES  2001** | **Gundi  2001** | **Moom  2001** | **Grif  2006** | **Gun  2006** | **Gun  2007** | **Yanco  2007** | **Tem 2008** | **Yanco  Dry 2008** | **Yanco irr 2008** |
| --- | --- | --- | --- | --- | --- | --- | --- | --- | --- | --- | --- | --- | --- | --- | --- | --- | --- |
| T4*Ca.5*003 | Thelin/4*Camm | TC14 | Null |  |  |  |  |  |  |  | y |  |  |  |  |  |  |
| T4*Ca.7*001 | Thelin/4*Camm | TC14 | Null |  |  |  |  |  |  |  |  |  | y | y | y | y | y |
| T4*Ca.7*002 | Thelin/4*Camm | TC14 | Null |  |  |  |  |  |  |  |  |  | y | y | y | y | y |
| T4*Ca.7*006 | Thelin/4*Camm | TC14 | TC14 |  |  |  |  |  |  |  |  |  | y | y | y | y | y |
| T4*Ca.8*005 | Thelin/4*Camm | TC14 | TC14 |  |  |  |  |  |  |  |  |  | y | y | y | y | y |
| T4*Ca.8*006 | Thelin/4*Camm | TC14 | Null |  |  |  |  |  |  |  |  |  | y | y | y | y | y |
| T4*Ca.8*007 | Thelin/4*Camm | TC14 | Null |  |  |  |  |  |  |  |  |  | y | y | y | y | y |
| T4*Ca.8*010 | Thelin/4*Camm | TC14 | TC14 |  |  |  |  |  |  |  |  |  | y | y | y | y | y |
| T4*Ca.8*014 | Thelin/4*Camm | TC14 | Null |  |  |  |  |  |  |  |  |  | y | y | y | y | y |
| T4*Ca.8*018 | Thelin/4*Camm | TC14 | TC14 |  |  |  |  |  |  |  |  |  | y | y | y | y | y |
| T4*Ca.8*019 | Thelin/4*Camm | TC14 | Null |  |  |  |  |  |  |  |  |  | y | y | y | y | y |
| T4*Ca.8*020 | Thelin/4*Camm | TC14 | TC14 |  |  |  |  |  |  |  |  |  | y | y | y | y | y |
| T4*Ch.1*001 | Thelin/4*Chara | TC14 | TC14 |  |  |  |  |  |  |  |  |  | y | y | y | y | y |
| T4*Ch.1*002 | Thelin/4*Chara | TC14 | TC14 |  |  |  |  |  |  |  |  |  | y | y | y | y | y |
| T4*Ch.1*003 | Thelin/4*Chara | TC14 | Null |  |  |  |  |  |  |  |  |  | y | y | y | y | y |
| T4*Ch.1*004 | Thelin/4*Chara | TC14 | Null |  |  |  |  |  |  |  |  |  | y | y | y | y | y |
| T4*Ch.1*006 | Thelin/4*Chara | TC14 | Null |  |  |  |  |  |  |  | y |  | y | y | y | y | y |
| T4*Ch.1*007 | Thelin/4*Chara | TC14 | TC14 |  |  |  |  |  |  |  | y |  | y | y | y | y | y |
| T4*Ch.1*008 | Thelin/4*Chara | TC14 | TC14 |  |  |  |  |  |  |  |  |  | y | y | y | y | y |
| T4*Ch.1*009 | Thelin/4*Chara | TC14 | Null |  |  |  |  |  |  |  | y | y | y | y | y | y | y |
| T4*Ch.11*002 | Thelin/4*Chara | TC14 | TC14 |  |  |  |  |  |  |  |  |  | y | y | y | y | y |
| T4*Ch.11*007 | Thelin/4*Chara | TC14 | Null |  |  |  |  |  |  |  |  |  | y | y | y | y | y |
| T4*Ch.11*009 | Thelin/4*Chara | TC14 | TC14 |  |  |  |  |  |  |  |  |  | y | y | y | y | y |
| T4*Ch.2*004 | Thelin/4*Chara | TC14 | Null |  |  |  |  |  |  |  |  |  | y | y | y | y | y |
| T4*Ch.2*009 | Thelin/4*Chara | TC14 | TC14 |  |  |  |  |  |  |  |  |  | y | y | y | y | y |
| T4*Ch.2*011 | Thelin/4*Chara | TC14 | Null |  |  |  |  |  |  |  |  |  | y | y | y | y | y |
| T4*Ch.2*012 | Thelin/4*Chara | TC14 | TC14 |  |  |  |  |  |  |  |  |  | y | y | y | y | y |

**Table S1.** *Cont.*

| **Entry** | **Pedigree** | **Trans. Group** | **Translocation** | **GES  2000** | **Gundi  2000** | **Moom  2000** | **Condo  2001** | **GES  2001** | **Gundi  2001** | **Moom  2001** | **Grif  2006** | **Gun  2006** | **Gun  2007** | **Yanco  2007** | **Tem 2008** | **Yanco  Dry 2008** | **Yanco irr 2008** |
| --- | --- | --- | --- | --- | --- | --- | --- | --- | --- | --- | --- | --- | --- | --- | --- | --- | --- |
| T4*Ch.6*006 | Thelin/4*Chara | TC14 | TC14 |  |  |  |  |  |  |  |  |  | y | y | y | y | y |
| T4*Ch.6*012 | Thelin/4*Chara | TC14 | Null |  |  |  |  |  |  |  |  |  | y | y | y | y | y |
| T4*Ch.7*001 | Thelin/4*Chara | TC14 | Null |  |  |  |  |  |  |  |  |  | y | y | y | y | y |
| T4*Ch.7*008 | Thelin/4*Chara | TC14 | TC14 |  |  |  |  |  |  |  |  |  | y | y | y | y | y |
| T4*Ch11*003 | Thelin/4*Chara | TC14 | Null |  |  |  |  |  |  |  | y |  | y | y | y | y | y |
| T4*D.10*001 | Thelin/ 4*Drysdale | TC14 | Null |  |  |  |  |  |  |  | y | y |  |  |  |  |  |
| T4*D.10*004 | Thelin/ 4*Drysdale | TC14 | Null |  |  |  |  |  |  |  | y | y |  |  |  |  |  |
| T4*D.10*005 | Thelin/ 4*Drysdale | TC14 | Null |  |  |  |  |  |  |  | y | y |  |  |  |  |  |
| T4*D.10*006 | Thelin/ 4*Drysdale | TC14 | Null |  |  |  |  |  |  |  | Y |  |  |  |  |  |  |
| T4*D.2*001 | Thelin/ 4*Drysdale | TC14 | Null |  |  |  |  |  |  |  | y | y | y | y | y | y | y |
| T4*D.2*003 | Thelin/ 4*Drysdale | TC14 | TC14 |  |  |  |  |  |  |  |  |  | y | y | y | y | y |
| T4*D.2*004 | Thelin/ 4*Drysdale | TC14 | TC14 |  |  |  |  |  |  |  | y |  | y | y | y | y | y |
| T4*D.3*004 | Thelin/ 4*Drysdale | TC14 | Null |  |  |  |  |  |  |  | y |  |  |  |  |  |  |
| T4*D.3*011 | Thelin/ 4*Drysdale | TC14 | Null |  |  |  |  |  |  |  | y |  |  |  |  |  |  |
| T4*D.5*001 | Thelin/ 4*Drysdale | TC14 | TC14 |  |  |  |  |  |  |  |  |  | y | y | y | y | y |

**Table S1.** *Cont.*

| **Entry** | **Pedigree** | **Trans. Group** | **Translocation** | **GES  2000** | **Gundi  2000** | **Moom  2000** | **Condo  2001** | **GES  2001** | **Gundi  2001** | **Moom  2001** | **Grif  2006** | **Gun  2006** | **Gun  2007** | **Yanco  2007** | **Tem 2008** | **Yanco  Dry 2008** | **Yanco irr 2008** |
| --- | --- | --- | --- | --- | --- | --- | --- | --- | --- | --- | --- | --- | --- | --- | --- | --- | --- |
| T4*D.5*003 | Thelin/ 4*Drysdale | TC14 | Null |  |  |  |  |  |  |  | y | y | y | y | y | y | y |
| T4*D.5*004 | Thelin/ 4*Drysdale | TC14 | Null |  |  |  |  |  |  |  | y | y | y | y | y | y | y |
| T4*D.5*005 | Thelin/ 4*Drysdale | TC14 | Null |  |  |  |  |  |  |  |  |  | y | y | y | y | y |
| T4*D.5*008 | Thelin/ 4*Drysdale | TC14 | TC14 |  |  |  |  |  |  |  |  |  | y | y | y | y | y |
| T4*D.5*013 | Thelin/ 4*Drysdale | TC14 | TC14 |  |  |  |  |  |  |  | y |  | y | y | y | y | y |
| T4*D.5*016 | Thelin/ 4*Drysdale | TC14 | Null |  |  |  |  |  |  |  | y | y | y | y | y | y | y |
| T4*D.5*017 | Thelin/ 4*Drysdale | TC14 | Null |  |  |  |  |  |  |  | y | y | y | y | y | y | y |
| T4*D.5*032 | Thelin/ 4*Drysdale | TC14 | Null |  |  |  |  |  |  |  | y |  | y | y | y | y | y |
| T4*D.5*033 | Thelin/ 4*Drysdale | TC14 | Null |  |  |  |  |  |  |  | y | y | y | y | y | y | y |
| T4*D.5*101 | Thelin/4*Drysdale | TC14 | Null |  |  |  |  |  |  |  | y |  | y | y | y | y | y |
| T4*D.9*010 | Thelin/ 4*Drysdale | TC14 | TC14 |  |  |  |  |  |  |  | y | y | y | y | y | y | y |
| T4*H.11*001 | Thelin/4*H45 | TC14 | Null |  |  |  |  |  |  |  | y |  |  |  |  |  |  |
| T4*H.11*002 | Thelin/4*H45 | TC14 | Null |  |  |  |  |  |  |  | y | Y |  |  |  |  |  |
| T4*H.11*003 | Thelin/4*H45 | TC14 | Null |  |  |  |  |  |  |  | y | Y |  |  |  |  |  |
| T4*H.11*004 | Thelin/4*H45 | TC14 | Null |  |  |  |  |  |  |  | y |  | y | y | y | y | y |
| T4*H.11*005 | Thelin/4*H45 | TC14 | TC14 |  |  |  |  |  |  |  | y |  | y | y | y | y | y |

**Table S1.** *Cont.*

| **Entry** | **Pedigree** | **Trans. Group** | **Translocation** | **GES  2000** | **Gundi  2000** | **Moom  2000** | **Condo  2001** | **GES  2001** | **Gundi  2001** | **Moom  2001** | **Grif  2006** | **Gun  2006** | **Gun  2007** | **Yanco  2007** | **Tem 2008** | **Yanco  Dry 2008** | **Yanco irr 2008** |
| --- | --- | --- | --- | --- | --- | --- | --- | --- | --- | --- | --- | --- | --- | --- | --- | --- | --- |
| T4*H.11*008 | Thelin/4*H45 | TC14 | Null |  |  |  |  |  |  |  | y |  | y | y | y | y | y |
| T4*H.11*009 | Thelin/4*H45 | TC14 | Null |  |  |  |  |  |  |  | y |  | y | y | y | y | y |
| T4*H.11*010 | Thelin/4*H45 | TC14 | TC14 |  |  |  |  |  |  |  |  |  | y | y | y | y | y |
| T4*H.12*003 | Thelin/4*H45 | TC14 | Null |  |  |  |  |  |  |  | y |  |  |  |  |  |  |
| T4*H.2*003 | Thelin/4*H45 | TC14 | TC14 |  |  |  |  |  |  |  | y |  | y | y | y | y | y |
| T4*H.2*004 | Thelin/4*H45 | TC14 | Null |  |  |  |  |  |  |  | y |  | y | y | y | y | y |
| T4*H.2*007 | Thelin/4*H45 | TC14 | Null |  |  |  |  |  |  |  | y |  |  |  |  |  |  |
| T4*H.2*008 | Thelin/4*H45 | TC14 | Null |  |  |  |  |  |  |  | y | y | y | y | y | y | y |
| T4*H.4*003 | Thelin/4*H45 | TC14 | Null |  |  |  |  |  |  |  | y |  |  |  |  |  |  |
| T4*H.4*005 | Thelin/4*H45 | TC14 | Null |  |  |  |  |  |  |  | y | y |  |  |  |  |  |
| T4*H.7*002 | Thelin/4*H45 | TC14 | TC14 |  |  |  |  |  |  |  |  |  | y | y | y | y | y |
| T4*H.7*003 | Thelin/4*H45 | TC14 | Null |  |  |  |  |  |  |  |  |  | y | y | y | y | y |
| T4*H.7*004 | Thelin/4*H45 | TC14 | Null |  |  |  |  |  |  |  | y |  | y | y | y | y | y |
| T4*H.7*007 | Thelin/4*H45 | TC14 | Null |  |  |  |  |  |  |  | y | y |  |  |  |  |  |
| T4*H.9*004 | Thelin/4*H45 | TC14 | TC14 |  |  |  |  |  |  |  | y | y | y | y | y | y | y |
| T4*H.9*005 | Thelin/4*H45 | TC14 | TC14 |  |  |  |  |  |  |  | y | y | y | y | y | y | y |
| T4*H.9*006 | Thelin/4*H45 | TC14 | TC14 |  |  |  |  |  |  |  | y | y | y | y | y | y | y |
| T4*H.9*008 | Thelin/4*H45 | TC14 | TC14 |  |  |  |  |  |  |  | y | y | y | y | y | y | y |
| T4*H.9*010 | Thelin/4*H45 | TC14 | TC14 |  |  |  |  |  |  |  | y |  | y | y | y | y | y |
| T4*H.9*011 | Thelin/4*H45 | TC14 | Null |  |  |  |  |  |  |  | y | y | y | y | y | y | y |
| T4*H.9*013 | Thelin/4*H45 | TC14 | TC14 |  |  |  |  |  |  |  | y | y |  |  |  |  |  |
| T4*H.9*014 | Thelin/4*H45 | TC14 | Null |  |  |  |  |  |  |  | y | y | y | y | y | y | y |
| T4*H.9*015 | Thelin/4*H45 | TC14 | Null |  |  |  |  |  |  |  | y | y | y | y | y | y | y |
| T4*J.12*004 | Thelin/4*Janz | TC14 | Null |  |  |  |  |  |  |  | y |  | y | y | y | y | y |
| T4*J.12*006 | Thelin/4*Janz | TC14 | Null |  |  |  |  |  |  |  | y | y | y | y | y | y | y |
| T4*J.12*009 | Thelin/4*Janz | TC14 | TC14 |  |  |  |  |  |  |  |  |  | y | y | y | y | y |
| T4*J.12*015 | Thelin/4*Janz | TC14 | TC14 |  |  |  |  |  |  |  | y |  | y | y | y | y | y |

**Table S1.** *Cont.*

| **Entry** | **Pedigree** | **Trans. Group** | **Translocation** | **GES  2000** | **Gundi  2000** | **Moom  2000** | **Condo  2001** | **GES  2001** | **Gundi  2001** | **Moom  2001** | **Grif  2006** | **Gun  2006** | **Gun  2007** | **Yanco  2007** | **Tem 2008** | **Yanco  Dry 2008** | **Yanco irr 2008** |
| --- | --- | --- | --- | --- | --- | --- | --- | --- | --- | --- | --- | --- | --- | --- | --- | --- | --- |
| T4*J.12*016 | Thelin/4*Janz | TC14 | Null |  |  |  |  |  |  |  | y |  |  |  |  |  |  |
| T4*J.4*005 | Thelin/4*Janz | TC14 | TC14 |  |  |  |  |  |  |  |  |  | y | y | y | y | y |
| T4*J.4*007 | Thelin/4*Janz | TC14 | TC14 |  |  |  |  |  |  |  |  |  | y | y | y | y | y |
| T4*J.4*010 | Thelin/4*Janz | TC14 | Null |  |  |  |  |  |  |  |  |  | y | y | y | y | y |
| T4*J.4*012 | Thelin/4*Janz | TC14 | Null |  |  |  |  |  |  |  |  |  | y | y | y | y | y |
| T4*J.4*013 | Thelin/4*Janz | TC14 | TC14 |  |  |  |  |  |  |  | y |  | y | y | y | y | y |
| T4*J.4*015 | Thelin/4*Janz | TC14 | TC14 |  |  |  |  |  |  |  |  |  | y | y | y | y | y |
| T4*J.4*016 | Thelin/4*Janz | TC14 | TC14 |  |  |  |  |  |  |  |  |  | y | y | y | y | y |
| T4*J.4*018 | Thelin/4*Janz | TC14 | Null |  |  |  |  |  |  |  |  |  | y | y | y | y | y |
| T4*J.4*021 | Thelin/4*Janz | TC14 | Null |  |  |  |  |  |  |  |  |  | y | y | y | y | y |
| T4*J.4*024 | Thelin/4*Janz | TC14 | Null |  |  |  |  |  |  |  | y |  | y | y | y | y | y |
| T4*J.7*005 | Thelin/4*Janz | TC14 | TC14 |  |  |  |  |  |  |  |  |  | y | y | y | y | y |
| T4*J.7*012 | Thelin/4*Janz | TC14 | Null |  |  |  |  |  |  |  | y |  | y | y | y | y | y |
| T4*J.9*001 | Thelin/4*Janz | TC14 | Null |  |  |  |  |  |  |  |  |  | y | y | y | y | y |
| T4*J.9*004 | Thelin/4*Janz | TC14 | TC14 |  |  |  |  |  |  |  |  |  | y | y | y | y | y |
| T4*J.9*007 | Thelin/4*Janz | TC14 | Null |  |  |  |  |  |  |  |  |  | y | y | y | y | y |
| T4*J.9*009 | Thelin/4*Janz | TC14 | TC14 |  |  |  |  |  |  |  |  |  | y | y | y | y | y |
| T4*W.10*020 | Thelin/ 4*Westonia | TC14 | TC14 |  |  |  |  |  |  |  | y | y | y | y | y | y | y |
| T4*W.10*021 | Thelin/ 4*Westonia | TC14 | TC14 |  |  |  |  |  |  |  | y |  | y | y | y | y | y |
| T4*W.11*002 | Thelin/ 4*Westonia | TC14 | TC14 |  |  |  |  |  |  |  | y |  | y | y | y | y | y |
| T4*W.11*003 | Thelin/ 4*Westonia | TC14 | Null |  |  |  |  |  |  |  | y |  | y | y | y | y | y |

**Table S1.** *Cont.*

| **Entry** | **Pedigree** | **Trans. Group** | **Translocation** | **GES  2000** | **Gundi  2000** | **Moom  2000** | **Condo  2001** | **GES  2001** | **Gundi  2001** | **Moom  2001** | **Grif  2006** | **Gun  2006** | **Gun  2007** | **Yanco  2007** | **Tem 2008** | **Yanco  Dry 2008** | **Yanco irr 2008** |
| --- | --- | --- | --- | --- | --- | --- | --- | --- | --- | --- | --- | --- | --- | --- | --- | --- | --- |
| T4*W.11*005 | Thelin/ 4*Westonia | TC14 | Null |  |  |  |  |  |  |  |  |  | y | y | y | y | y |
| T4*W.11*006 | Thelin/ 4*Westonia | TC14 | Null |  |  |  |  |  |  |  | y | y | y | y | y | y | y |
| T4*W.11*008 | Thelin/ 4*Westonia | TC14 | Null |  |  |  |  |  |  |  |  |  | y | y | y | y | y |
| T4*W.11*013 | Thelin/ 4*Westonia | TC14 | Null |  |  |  |  |  |  |  | y | y | y | y | y | y | y |
| T4*W.11*014 | Thelin/ 4*Westonia | TC14 | Null |  |  |  |  |  |  |  | Y |  | y | y | y | y | y |
| T4*W.11*016 | Thelin/ 4*Westonia | TC14 | TC14 |  |  |  |  |  |  |  | Y | y | y | y | y | y | y |
| T4*W.11*017 | Thelin/ 4*Westonia | TC14 | TC14 |  |  |  |  |  |  |  | y | y | y | y | y | y | y |
| T4*W.11*022 | Thelin/ 4*Westonia | TC14 | TC14 |  |  |  |  |  |  |  | Y |  | y | y | y | y | y |
| T4*W.11*024 | Thelin/ 4*Westonia | TC14 | Null |  |  |  |  |  |  |  | y | y | y | y | y | y | y |
| T4*W.11*025 | Thelin/4*Westonia | TC14 | TC14 |  |  |  |  |  |  |  |  |  | y | y | y | y | y |
| T4*W.11*027 | Thelin/ 4*Westonia | TC14 | Null |  |  |  |  |  |  |  | Y |  | y | y | y | y | y |
| T4*W.2*005 | Thelin/ 4*Westonia | TC14 | TC14 |  |  |  |  |  |  |  | Y | y | y | y | y | y | y |
| T4*W.2*007 | Thelin/ 4*Westonia | TC14 | TC14 |  |  |  |  |  |  |  |  |  | y | y | y | y | y |

**Table S1.** *Cont.*

| **Entry** | **Pedigree** | **Trans. Group** | **Translocation** | **GES  2000** | **Gundi  2000** | **Moom  2000** | **Condo  2001** | **GES  2001** | **Gundi  2001** | **Moom  2001** | **Grif  2006** | **Gun  2006** | **Gun  2007** | **Yanco  2007** | **Tem 2008** | **Yanco  Dry 2008** | **Yanco irr 2008** |
| --- | --- | --- | --- | --- | --- | --- | --- | --- | --- | --- | --- | --- | --- | --- | --- | --- | --- |
| T4*W.2*009 | Thelin/ 4*Westonia | TC14 | Null |  |  |  |  |  |  |  | Y |  | y | y | y | y | y |
| T4*W.2*011 | Thelin/ 4*Westonia | TC14 | Null |  |  |  |  |  |  |  | y | y | y | y | y | y | y |
| T4*W.2*012 | Thelin/ 4*Westonia | TC14 | Null |  |  |  |  |  |  |  | Y |  | y | y | y | y | y |
| T4*W.6*003 | Thelin/ 4*Westonia | TC14 | Null |  |  |  |  |  |  |  | y |  |  |  |  |  |  |
| TDSunk.14*008 | Thelin/3*Drysdale//Sunbrook | TC14 | Null |  |  |  |  |  |  |  |  |  | y | y | y | y | y |
| TDSunk.14*010 | Thelin/3*Drysdale//Sunbrook | TC14 | TC14 |  |  |  |  |  |  |  |  |  | y | y | y | y | y |
| TDSunk.15*001 | Thelin/3*Drysdale//Sunbrook | TC14 | TC14 |  |  |  |  |  |  |  | y | y |  |  |  |  |  |
| TDSunk.15*002 | Thelin/3*Drysdale//Sunbrook | TC14 | Null |  |  |  |  |  |  |  | y | y |  |  |  |  |  |
| TDSunk.15*004 | Thelin/3*Drysdale//Sunbrook | TC14 | Null |  |  |  |  |  |  |  | y | y |  |  |  |  |  |
| TDSunk.15*005 | Thelin/3*Drysdale//Sunbrook | TC14 | TC14 |  |  |  |  |  |  |  | y | y | y | y | y | y | y |
| TDSunk.15*006 | Thelin/3*Drysdale//Sunbrook | TC14 | Null |  |  |  |  |  |  |  | y | y | y | y | y | y | y |
| TDSunk.15*010 | Thelin/3*Drysdale//Sunbrook | TC14 | TC14 |  |  |  |  |  |  |  |  |  | y | y | y | y | y |
| TDSunk.15*015 | Thelin/3*Drysdale//Sunbrook | TC14 | Null |  |  |  |  |  |  |  | y | y |  |  |  |  |  |

**Table S1.** *Cont.*

| **Entry** | **Pedigree** | **Trans. Group** | **Translocation** | **GES  2000** | **Gundi  2000** | **Moom  2000** | **Condo  2001** | **GES  2001** | **Gundi  2001** | **Moom  2001** | **Grif  2006** | **Gun  2006** | **Gun  2007** | **Yanco  2007** | **Tem 2008** | **Yanco  Dry 2008** | **Yanco irr 2008** |
| --- | --- | --- | --- | --- | --- | --- | --- | --- | --- | --- | --- | --- | --- | --- | --- | --- | --- |
| TDSunk.15*016 | Thelin/3*Drysdale//Sunbrook | TC14 | Null |  |  |  |  |  |  |  | y |  | y | y | y | y | y |
| TDSunk.15*017 | Thelin/3*Drysdale//Sunbrook | TC14 | TC14 |  |  |  |  |  |  |  | y | y | y | y | y | y | y |
| TDSunk.15*020 | Thelin/3*Drysdale//Sunbrook | TC14 | Null |  |  |  |  |  |  |  |  |  | y | y | y | y | y |
| TDSunk.19*001 | Thelin/3*Drysdale//Sunbrook | TC14 | TC14 |  |  |  |  |  |  |  | y |  | y | y | y | y | y |
| TDSunk.19*010 | Thelin/3*Drysdale//Sunbrook | TC14 | Null |  |  |  |  |  |  |  |  |  | y | y | y | y | y |
| TDSunk.2*001 | Thelin/3*Drysdale//Sunbrook | TC14 | TC14 |  |  |  |  |  |  |  |  |  | y | y | y | y | y |
| TDSunk.2*005 | Thelin/3*Drysdale//Sunbrook | TC14 | Null |  |  |  |  |  |  |  |  |  | y | y | y | y | y |
| TDSunk.2*011 | Thelin/3*Drysdale//Sunbrook | TC14 | TC14 |  |  |  |  |  |  |  |  |  | y | y | y | y | y |
| TDSunk.20*002 | Thelin/3*Drysdale//Sunbrook | TC14 | TC14 |  |  |  |  |  |  |  | y |  | y | y | y | y | y |
| TDSunk.20*003 | Thelin/3*Drysdale//Sunbrook | TC14 | TC14 |  |  |  |  |  |  |  | y |  | y | y | y | y | y |
| TDSunk.20*011 | Thelin/3*Drysdale//Sunbrook | TC14 | Null |  |  |  |  |  |  |  | y | y | y | y | y | y | y |
| TDSunk.3*006 | Thelin/3*Drysdale//Sunbrook | TC14 | Null |  |  |  |  |  |  |  | y | y | y | y | y | y | y |
| TDSunk.3*007 | Thelin/3*Drysdale//Sunbrook | TC14 | Null |  |  |  |  |  |  |  | y | y | y | y | y | y | y |

**Table S1.** *Cont.*

| **Entry** | **Pedigree** | **Trans. Group** | **Translocation** | **GES  2000** | **Gundi  2000** | **Moom  2000** | **Condo  2001** | **GES  2001** | **Gundi  2001** | **Moom  2001** | **Grif  2006** | **Gun  2006** | **Gun  2007** | **Yanco  2007** | **Tem 2008** | **Yanco  Dry 2008** | **Yanco irr 2008** |
| --- | --- | --- | --- | --- | --- | --- | --- | --- | --- | --- | --- | --- | --- | --- | --- | --- | --- |
| TDSunk.3*008 | Thelin/3*Drysdale//Sunbrook | TC14 | TC14 |  |  |  |  |  |  |  | y |  | y | y | y | y | y |
| TDSunk.3*017 | Thelin/3*Drysdale//Sunbrook | TC14 | Null |  |  |  |  |  |  |  | y |  | y | y | y | y | y |
| TDSunk.3*018 | Thelin/3*Drysdale//Sunbrook | TC14 | TC14 |  |  |  |  |  |  |  | y | y | y | y | y | y | y |
| TDSunk.3*020 | Thelin/3*Drysdale//Sunbrook | TC14 | Null |  |  |  |  |  |  |  | y | y | y | y | y | y | y |
| TDSunk.3*021 | Thelin/3*Drysdale//Sunbrook | TC14 | TC14 |  |  |  |  |  |  |  |  |  | y | y | y | y | y |
| TDSunk.3*022 | Thelin/3*Drysdale//Sunbrook | TC14 | Null |  |  |  |  |  |  |  | y |  |  |  |  |  |  |
| TDSunk.3*023 | Thelin/3*Drysdale//Sunbrook | TC14 | Null |  |  |  |  |  |  |  | y |  |  |  |  |  |  |
| TDSunk.3*026 | Thelin/3*Drysdale//Sunbrook | TC14 | Null |  |  |  |  |  |  |  | y |  |  |  |  |  |  |
| TDSunk.3*033 | Thelin/3*Drysdale//Sunbrook | TC14 | Null |  |  |  |  |  |  |  | y | y |  |  |  |  |  |
| TDSunk.3*034 | Thelin/3*Drysdale//Sunbrook | TC14 | TC14 |  |  |  |  |  |  |  | y | y |  |  |  |  |  |
| TDSunk.3*035 | Thelin/3*Drysdale//Sunbrook | TC14 | Null |  |  |  |  |  |  |  | y | y |  |  |  |  |  |
| THDart.11*005 | Thelin/3*H45// Darter | TC14 | TC14 |  |  |  |  |  |  |  | Y |  |  |  |  |  |  |
| THDart.11*017 | Thelin/3*H45/ /Darter | TC14 | Null |  |  |  |  |  |  |  | Y |  |  |  |  |  |  |

**Table S1.** *Cont.*

| **Entry** | **Pedigree** | **Trans. Group** | **Translocation** | **GES  2000** | **Gundi  2000** | **Moom  2000** | **Condo  2001** | **GES  2001** | **Gundi  2001** | **Moom  2001** | **Grif  2006** | **Gun  2006** | **Gun  2007** | **Yanco  2007** | **Tem 2008** | **Yanco  Dry 2008** | **Yanco irr 2008** |
| --- | --- | --- | --- | --- | --- | --- | --- | --- | --- | --- | --- | --- | --- | --- | --- | --- | --- |
| THDart.12*018 | Thelin/3*H45// Darter | TC14 | Null |  |  |  |  |  |  |  | y | y |  |  |  |  |  |
| THDart.3*008 | Thelin/3*H45// Darter | TC14 | Null |  |  |  |  |  |  |  | y |  |  |  |  |  |  |
| THDart.3*014 | Thelin/3*H45// Darter | TC14 | Null |  |  |  |  |  |  |  | y | y |  |  |  |  |  |
| THDart.9*003 | Thelin/3*H45// Darter | TC14 | Null |  |  |  |  |  |  |  | y |  |  |  |  |  |  |
| THDart.9*019 | Thelin/3*H45// Darter | TC14 | TC14 |  |  |  |  |  |  |  | y |  |  |  |  |  |  |
| TJSuni.7*003 | Thelin/3*Janz// Sunbri | TC14 | Null |  |  |  |  |  |  |  | y | Y |  |  |  |  |  |
| TJSuni.9*005 | Thelin/3*Janz// Sunbri | TC14 | Null |  |  |  |  |  |  |  | y |  |  |  |  |  |  |
| TJSuni.9*010 | Thelin/3*Janz// Sunbri | TC14 | Null |  |  |  |  |  |  |  | y |  |  |  |  |  |  |
| TJSuni.9*014 | Thelin/3*Janz// Sunbri | TC14 | TC14 |  |  |  |  |  |  |  | y |  |  |  |  |  |  |
| TWSunk.1*005 | Thelin/3*Westonia//Sunbrook | TC14 | Null |  |  |  |  |  |  |  | y |  |  |  |  |  |  |
| TWSunk.1*007 | Thelin/3*Westonia//Sunbrook | TC14 | Null |  |  |  |  |  |  |  | y | Y |  |  |  |  |  |
| TWSunk.1*008 | Thelin/3*Westonia//Sunbrook | TC14 | Null |  |  |  |  |  |  |  | y |  |  |  |  |  |  |
| TWSunk.1*009 | Thelin/3*Westonia//Sunbrook | TC14 | Null |  |  |  |  |  |  |  | y | Y |  |  |  |  |  |

**Table S1.** *Cont.*

| **Entry** | **Pedigree** | **Trans. Group** | **Translocation** | **GES  2000** | **Gundi  2000** | **Moom  2000** | **Condo  2001** | **GES  2001** | **Gundi  2001** | **Moom  2001** | **Grif  2006** | **Gun  2006** | **Gun  2007** | **Yanco  2007** | **Tem 2008** | **Yanco  Dry 2008** | **Yanco irr 2008** |
| --- | --- | --- | --- | --- | --- | --- | --- | --- | --- | --- | --- | --- | --- | --- | --- | --- | --- |
| TWSunk.1*010 | Thelin/3*Westonia//Sunbrook | TC14 | Null |  |  |  |  |  |  |  | y |  |  |  |  |  |  |
| TWSunk.1*013 | Thelin/3*Westonia//Sunbrook | TC14 | Null |  |  |  |  |  |  |  | y | Y |  |  |  |  |  |
| TWSunk.11*001 | Thelin/3*Westonia//Sunbrook | TC14 | Null |  |  |  |  |  |  |  | y |  | y | y | y | y | y |
| TWSunk.11*002 | Thelin/3*Westonia//Sunbrook | TC14 | Null |  |  |  |  |  |  |  | y | y | y | y | y | y | y |
| TWSunk.11*003 | Thelin/3*Westonia//Sunbrook | TC14 | TC14 |  |  |  |  |  |  |  |  |  | y | y | y | y | y |
| TWSunk.11*005 | Thelin/3*Westonia//Sunbrook | TC14 | Null |  |  |  |  |  |  |  | y | y | y | y | y | y | y |
| TWSunk.11*006 | Thelin/3*Westonia//Sunbrook | TC14 | TC14 |  |  |  |  |  |  |  | y | y | y | y | y | y | y |
| TWSunk.11*007 | Thelin/3*Westonia//Sunbrook | TC14 | TC14 |  |  |  |  |  |  |  | y |  | y | y | y | y | y |
| TWSunk.11*008 | Thelin/3*Westonia//Sunbrook | TC14 | Null |  |  |  |  |  |  |  |  |  | y | y | y | y | y |
| TWSunk.11*009 | Thelin/3*Westonia//Sunbrook | TC14 | Null |  |  |  |  |  |  |  |  |  | y | y | y | y | y |
| TWSunk.11*010 | Thelin/3*Westonia//Sunbrook | TC14 | TC14 |  |  |  |  |  |  |  | y | y | y | y | y | y | y |
| TWSunk.11*011 | Thelin/3*Westonia//Sunbrook | TC14 | Null |  |  |  |  |  |  |  |  |  | y | y | y | y | y |
| TWSunk.11*012 | Thelin/3*Westonia//Sunbrook | TC14 | Null |  |  |  |  |  |  |  | y | y | y | y | y | y | y |

**Table S1.** *Cont.*

| **Entry** | **Pedigree** | **Trans. Group** | **Translocation** | **GES  2000** | **Gundi  2000** | **Moom  2000** | **Condo  2001** | **GES  2001** | **Gundi  2001** | **Moom  2001** | **Grif  2006** | **Gun  2006** | **Gun  2007** | **Yanco  2007** | **Tem 2008** | **Yanco  Dry 2008** | **Yanco irr 2008** |
| --- | --- | --- | --- | --- | --- | --- | --- | --- | --- | --- | --- | --- | --- | --- | --- | --- | --- |
| TWSunk.11*013 | Thelin/3*Westonia//Sunbrook | TC14 | TC14 |  |  |  |  |  |  |  | y |  | y | y | y | y | y |
| TWSunk.11*017 | Thelin/3*Westonia//Sunbrook | TC14 | TC14 |  |  |  |  |  |  |  |  |  | y | y | y | y | y |
| TWSunk.11*019 | Thelin/3*Westonia//Sunbrook | TC14 | TC14 |  |  |  |  |  |  |  |  |  | y | y | y | y | y |
| TWSunk.11*020 | Thelin/3*Westonia//Sunbrook | TC14 | TC14 |  |  |  |  |  |  |  | y | y | y | y | y | y | y |
| TWSunk.11*021 | Thelin/3*Westonia//Sunbrook | TC14 | TC14 |  |  |  |  |  |  |  | y | y | y | y | y | y | y |
| TWSunk.12*003 | Thelin/3*Westonia//Sunbrook | TC14 | TC14 |  |  |  |  |  |  |  | y |  |  |  |  |  |  |
| TWSunk.12*006 | Thelin/3*Westonia//Sunbrook | TC14 | Null |  |  |  |  |  |  |  | y | y |  |  |  |  |  |
| TWSunk.12*008 | Thelin/3*Westonia//Sunbrook | TC14 | TC14 |  |  |  |  |  |  |  | y |  |  |  |  |  |  |
| TWSunk.8*001 | Thelin/3*Westonia//Sunbrook | TC14 | TC14 |  |  |  |  |  |  |  |  |  | y | y | y | y | y |
| TWSunk.8*002 | Thelin/3*Westonia//Sunbrook | TC14 | Null |  |  |  |  |  |  |  | y | y | y | y | y | y | y |
| TWSunk.8*005 | Thelin/3*Westonia//Sunbrook | TC14 | TC14 |  |  |  |  |  |  |  | y |  | y | y | y | y | y |
| TWSunk.8*007 | Thelin/3*Westonia//Sunbrook | TC14 | TC14 |  |  |  |  |  |  |  |  |  | y | y | y | y | y |
| TWSunk.8*009 | Thelin/3*Westonia//Sunbrook | TC14 | Null |  |  |  |  |  |  |  | y |  | y | y | y | y | y |

**Table S1.** *Cont.*

| **Entry** | **Pedigree** | **Trans. Group** | **Translocation** | **GES  2000** | **Gundi  2000** | **Moom  2000** | **Condo  2001** | **GES  2001** | **Gundi  2001** | **Moom  2001** | **Grif  2006** | **Gun  2006** | **Gun  2007** | **Yanco  2007** | **Tem 2008** | **Yanco  Dry 2008** | **Yanco irr 2008** |
| --- | --- | --- | --- | --- | --- | --- | --- | --- | --- | --- | --- | --- | --- | --- | --- | --- | --- |
| TWSunk.8*011 | Thelin/3*Westonia//Sunbrook | TC14 | TC14 |  |  |  |  |  |  |  | y |  | y | y | y | y | y |
| TWSunk.8*012 | Thelin/3*Westonia//Sunbrook | TC14 | TC14 |  |  |  |  |  |  |  |  |  | y | y | y | y | y |
| TWSunk.8*013 | Thelin/3*Westonia//Sunbrook | TC14 | Null |  |  |  |  |  |  |  |  |  | y | y | y | y | y |
| TWSunk.8*016 | Thelin/3*Westonia//Sunbrook | TC14 | Null |  |  |  |  |  |  |  | y | y | y | y | y | y | y |
| TWSunk.8*019 | Thelin/3*Westonia//Sunbrook | TC14 | Null |  |  |  |  |  |  |  |  |  | y | y | y | y | y |
| TWSunk.8*023 | Thelin/3*Westonia//Sunbrook | TC14 | TC14 |  |  |  |  |  |  |  |  |  | y | y | y | y | y |
| TWSunk.8*103 | Thelin/3*Westonia//Sunbrook | TC14 | Null |  |  |  |  |  |  |  |  |  | y | y | y | y | y |
| Westonia | Westonia | TC14 | Null |  |  |  |  |  |  |  | y | y | y | y | y | y | y |
